# Supplementary material
Source: HighWire-hosted journal article supplement (https://www.jneurosci.org/content/40/41/7949)
Supplement: inline-supplementary-material-8 [file inline-supplementary-material-8.docx]

**EXTENDED DATA FIG. 8-1**

**Detailed inferential statistics for the direct comparison of the BST to the Amygdala.**

| **Contrast**a | **BST** | | **Amygdala** | | **R** | **Region × Condition** | **Cohen’s *dz*** | **TOST for a ‘Medium’ Effect**  ***dZ* = .35a** |
| --- | --- | --- | --- | --- | --- | --- | --- | --- |
| ***M*** | ***SD*** | ***M*** | ***SD*** |
| Uncertain Threat vs. Uncertain Safety | .2186 | .60067 | .1200 | .32312 | .273 | t(98)=1.637, p=.105 | .16 | t(98)=1.85, p=.034 |
| Certain Threat vs. Certain Safety | .2290 | .67035 | .2118 | .43576 | .300 | t(98)=.251, p=.802 | .03 | t(98)=3.23, p=.001 |
| Certain Threat vs. Uncertain Threat | -.2569 | .52219 | -.1997 | .35992 | .369 | t(98)=1.109, p=.270 | .11 | t(98)=2.37, p=.010 |

a (Lakens, 2017).
